# Supplementary material for: A novel green synthesis of silver nanoparticles by the residues of Chinese herbal medicine and their biological activities
Source: PubMed Central journal article supplement — RSC Adv. 2021 Jan 5;11(3):1411–9. doi: 10.1039/d0ra08287b (PMC8693586; doi:10.1039/d0ra08287b), 2021-01-05
Supplement: RA-011-D0RA08287B-s001.pdf [file RA-011-D0RA08287B-s001.pdf]

Supporting Information for

# **A Novel Green Synthesis of Silver Nanoparticles by the Residues of Chinese Herbal Medicine and their Biological Activities**

Simin Wei<sup>†a</sup>, Yinghui Wang<sup>†\*b</sup>, Zhishu Tang<sup>\*a</sup>, Hongbo Xu<sup>a</sup>, Zhe Wang<sup>a</sup>, Tian Yang<sup>a</sup>, Taiyan Zou<sup>a</sup>

(<sup>a</sup> Shaanxi Collaborative Innovation Center of Chinese Medicine Resources Industrialization, State Key Laboratory of Research & Development of Characteristic Qin Medicine Resources/Shaanxi Innovative Drug Research Center, Shaanxi University of Chinese Medicine, 712046, China)

(<sup>b</sup> College of Science, Chang'an University, 710064, China)

(<sup>†</sup> These authors contributed equally)

(\* corresponding authors, E-mail addresses: wangyinghui@iccas.ac.cn (YH Wang); tzs6565@163.com (ZS Tang))

Table S1 The average size of AgNPs obtained at different biosynthesis parameters with the material proportion of waste extract:AgNO<sub>3</sub> = 1:1.

| Times/h | pH of waste extract |          |          |           |           |           |          |
|---------|---------------------|----------|----------|-----------|-----------|-----------|----------|
|         | 4.0                 | 5.0      | 6.0      | 7.0       | 8.0       | 9.0       | 10.0     |
| 1.0     | 104.7±0.7           | 36.6±0.6 | 77.8±1.4 | 99.7±0.1  | 94.1±1.3  | 129.9±3.5 | 31.9±1.6 |
| 2.0     | 112.3±0.2           | 62.5±2.7 | 98.2±1.6 | 79.8±2.9  | 81.9±5.2  | 176.0±3.7 | 32.3±1.8 |
| 3.0     | 109.6±1.0           | 39.8±0.8 | 70.4±2.2 | 93.1±8.1  | 95.1±3.7  | 122.1±1.9 | 25.1±1.0 |
| 4.0     | 71.9±0.4            | 60.1±1.0 | 64.8±1.3 | 85.3±11.8 | 70.3±0.2  | 121.0±1.8 | 34.2±0.9 |
| 5.0     | 94.8±1.1            | 44.5±0.3 | 79.4±1.3 | 59.8±0.3  | 71.7±0.4  | 98.3±1.9  | 23.7±1.2 |
| 6.0     | 130.9±1.8           | 38.1±1.4 | 83.4±1.1 | 73.1±5.6  | 110.4±8.3 | 122.4±6.4 | 22.2±0.5 |

Table S2 The average size of AgNPs obtained at different material proportion (pH 10.0) after 2 h reaction.

| Size/nm | Waste extract:AgNO <sub>3</sub> |          |          |          |          |
|---------|---------------------------------|----------|----------|----------|----------|
|         | 2:1                             | 1:1      | 1:2      | 1:3      | 1:5      |
|         | 49.6±0.8                        | 32.3±1.8 | 35.8±1.2 | 54.8±3.9 | 53.4±3.3 |

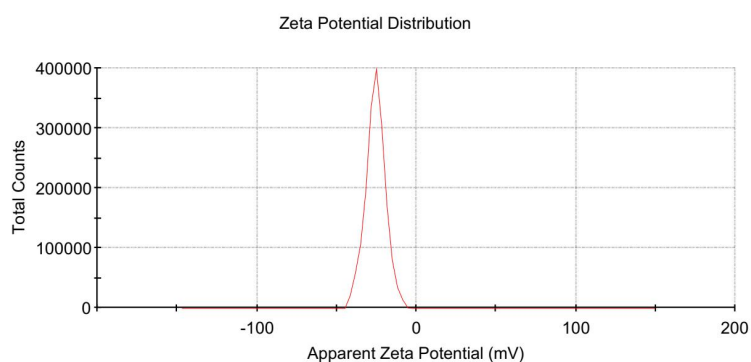

Figure S1 Zeta potential of biosynthesized AgNPs under the most efficient parameters

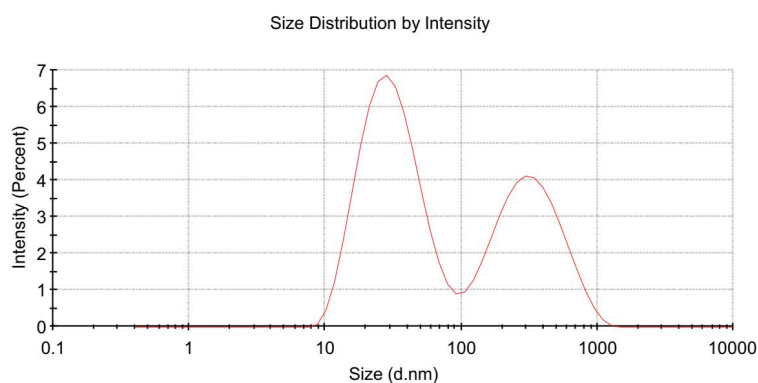

Figure S2 The average size of biosynthesized AgNPs after 2 month storage

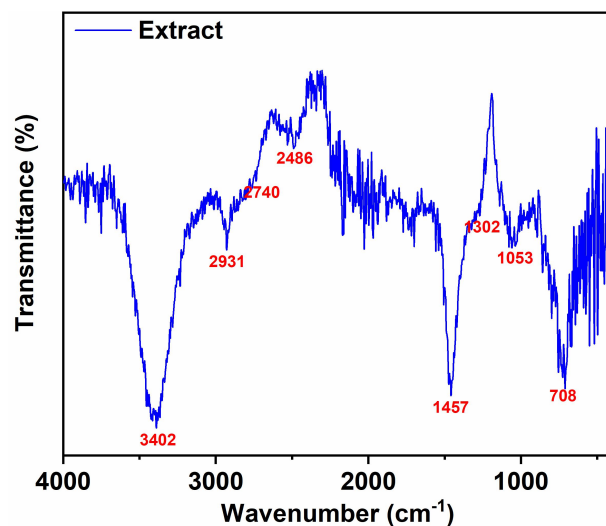

Figure S3 FT-IR spectra of Bazheng Mixture residue extract (the peak at 3402 cm<sup>-1</sup> corresponds almost entirely to the N-H stretching vibrations of the peptide linkages. The peak at 2931 cm<sup>-1</sup> belongs to the stretching vibration of methyl groups. The broad peak from 2287 to 1193 cm<sup>-1</sup>, which has a sharp peak locating at 1457 cm<sup>-1</sup>, are attributed to C=O stretching vibrations of cyclic esters from the vitamins, germinal methyl groups, amide I groups of proteins, and the bending vibration of C-OH groups and the anti-symmetric stretching band of C-O-C groups of polysaccharides and/or chlorophyll, respectively)
